# Supplementary material for: Intake of Natural, Unprocessed Tiger Nuts (Cyperus esculentus L.) Drink Significantly Favors Intestinal Beneficial Bacteria in a Short Period of Time
Source: MDPI journal article supplement (doi:10.3390/nu14091709), 2022-04-20
Supplement: s1 [file s1]

## Supplementary Materials

**Figure S1.** Global microbiota distribution in samples and overrepresented genera among the five clusters identified in the text and in Figure 1. **(A)** Beta diversity Principal coordinates analysis (PCoA) derived from Bray Curtis distances among samples ( $p = 0.003$  by PERMANOVA). **(B)** Microbial clusters and representative microbial taxa at genus level according to migration groups between baseline clusters and after the intervention. **(C)** LEfSe analysis indicates differentially abundant genus in each cluster.

A)

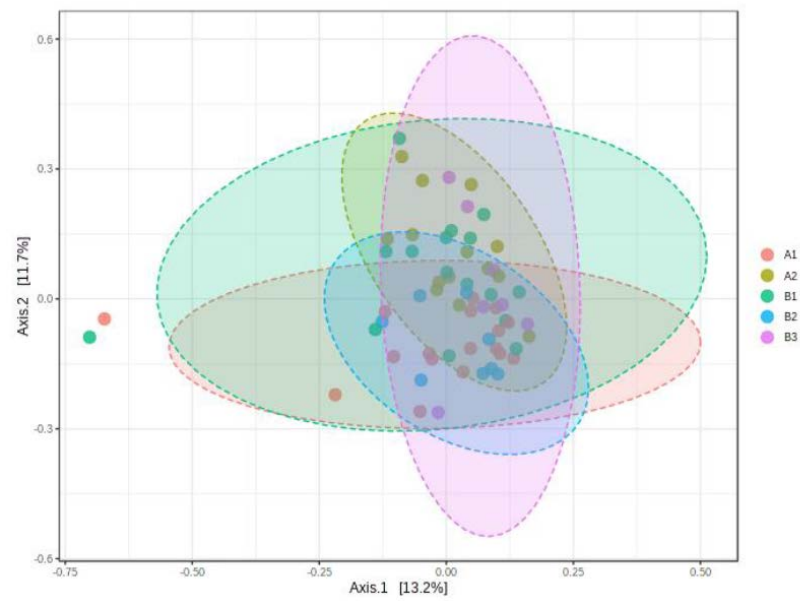

B)

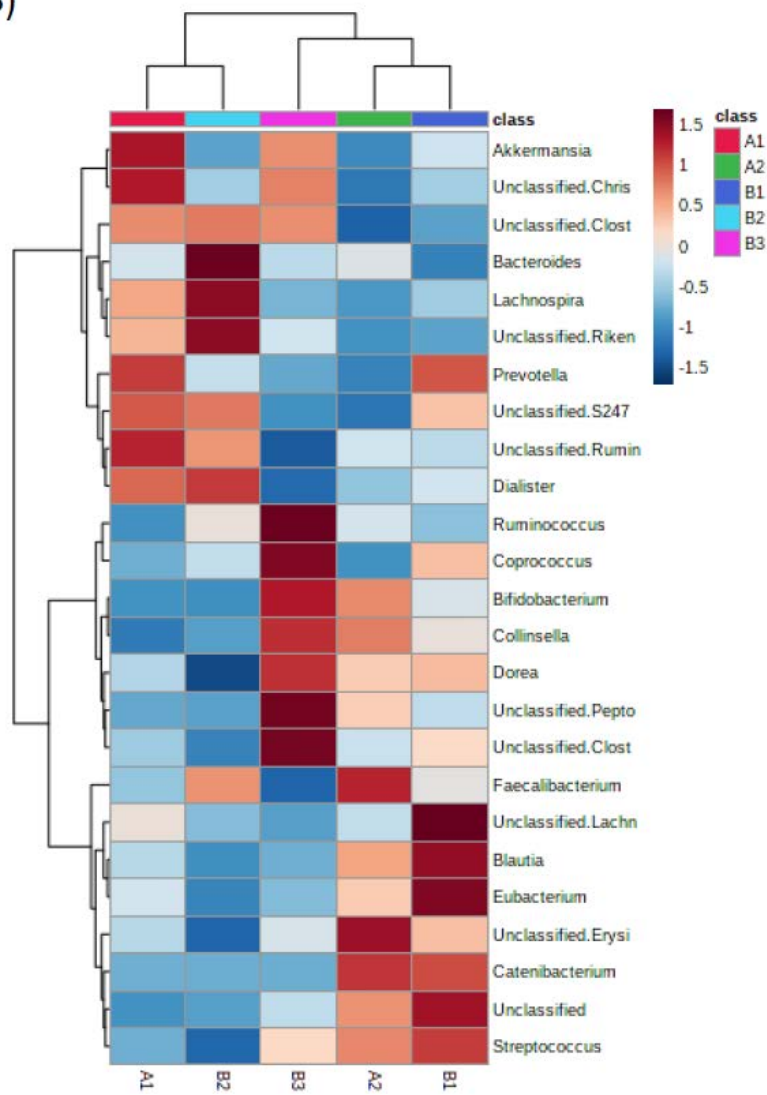

C)

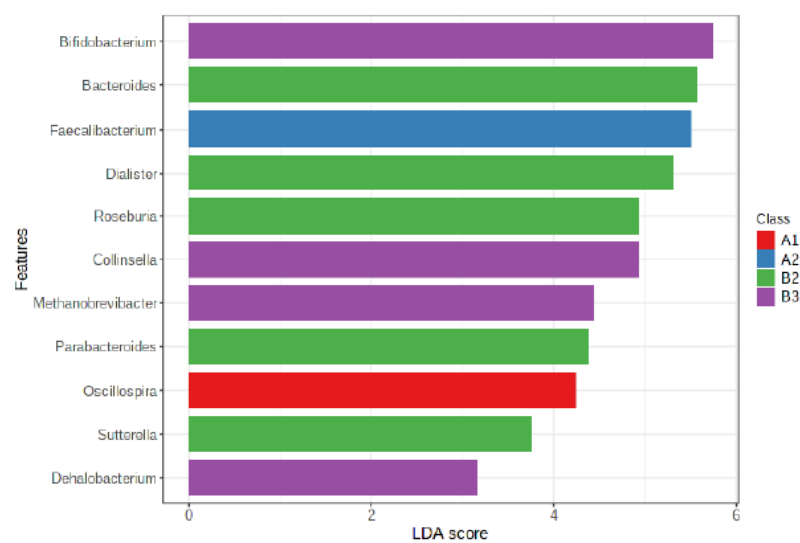

**Table S1.** Validation of a FFQ by use of a 3-day recall.

|                     | FFQ <sup>1</sup> | 3 day-records <sup>2</sup> | R     | p-value |
|---------------------|------------------|----------------------------|-------|---------|
| Total protein       | 102.7±13.4       | 104.6±21.6                 | 0.332 | 0.268   |
| Animal protein      | 65.6±13.9        | 67.6±28.6                  | 0.373 | 0.209   |
| Plant protein       | 37.1±7.4         | 37.1±9.7                   | 0.505 | 0.078   |
| Lipids              | 111.3±13.4       | 114.9±15.5                 | 0.710 | 0.007   |
| Carbohydrates       | 262.7±35.7       | 261.2±49.7                 | 0.668 | 0.013   |
| Total dietary fiber | 29.6±7.9         | 30.3±9.2                   | 0.760 | 0.003   |

<sup>1</sup>Data presented as the mean ± standard deviation. Comparison of the nutrient intake using a 3-day diet records and the food frequency questionnaire.

<sup>2</sup> Association between nutrient intakes estimated by a food frequency questionnaire (FFQ) and 3-day diet records by use of Pearson correlation coefficient (R) test. P<0.05 was statistically significant.

**Table S2.** Nutrient composition and calories of freshly prepared natural horchata without added sugars supplied in this assay. The composition of standard natural horchata with added sugars is described, as well as that of different brands of bottled pasteurized commercial horchata where starch has been hydrolysed.

|                     | Natural<br>Horchata<br>without<br>added sugar* | Standard Nat-<br>ural Horchata | Bottled pasteur-<br>ized Brand H† | Bottled pasteur-<br>ized Brand P† | Bottled pasteur-<br>ized Brand CU† | Bottled pasteur-<br>ized Brand CM† |
|---------------------|------------------------------------------------|--------------------------------|-----------------------------------|-----------------------------------|------------------------------------|------------------------------------|
|                     | g/100 ml                                       | g/100 ml                       | g/100 ml                          | g/100 ml                          | g/100 ml                           | g/100 ml                           |
| Lipids              | 4.1                                            | 4.1                            | 3.6                               | 3.6                               | 2,8                                | 3,8                                |
| Total Carbohydrates | 6.8                                            | 13.8                           | 12                                | 12                                | 11                                 | 13                                 |
| from which          |                                                |                                |                                   |                                   |                                    |                                    |
| Starch/ Fi-<br>bre  | 5.5                                            | 5.5                            | 1‡                                | 1‡                                | 1‡                                 | 1‡                                 |
| Simple<br>sugars    | 1.3                                            | 6.1                            | 11                                | 11                                | 10                                 | 12                                 |
| Protein             | 1.2                                            | 1.2                            | 1                                 | 1                                 | 0,6                                | 0,9                                |
| kcal/100 ml         | 68.9                                           | 165.9                          | 96.4                              | 96.4                              | 79.6                               | 89.8                               |

\* supplied in this study.

† nutrients composition as described in the label of different commercial products.

‡ the estimated content of residual carbohydrate polymers of 1%, which is possibly due to the reported use of stabilizers described in the ingredients list.

**Table S3.** Proportions of predominant genera in the different Microbiota profiles before and after the intervention.

|            |                         | Cluster A1          |                    | Cluster A2          |                    |
|------------|-------------------------|---------------------|--------------------|---------------------|--------------------|
|            |                         | Before Intervention | After Intervention | Before Intervention | After Intervention |
| Cluster B1 | <i>Akkermansia</i>      | 1.61 (3.86)         | 1.365 (7.19)       | 0.085 (0.44)        | 0.02 (0.18)        |
|            | <i>Bacteroides</i>      | 1.5 (1.27)          | 1.875 (1.49)       | 2.05 (1.57)         | 2.985 (3.86)       |
|            | <i>Bifidobacterium</i>  | 1.635 (2.69)        | 1.395 (1.99)       | 7.195 (5.09)        | 4.425 (7.23)       |
|            | <i>Blautia</i>          | 8.5 (11.24)         | 7.655 (3.57)       | 14.49 (4.50)        | 12.65 (9.30)       |
|            | <i>Collinsella</i>      | 1.24 (1.04)         | 0.735 (0.67)       | 1.36 (1.07)         | 2.11 (2.15)        |
|            | <i>Coprococcus</i>      | 5.27 (1.15)         | 3.28 (1.68)        | 6.515 (1.60)        | 4.525 (0.62)       |
|            | <i>Dialister</i>        | 0.01 (2.62)         | 0 (5.35)           | 0 (0.44)            | 0.015 (0.23)       |
|            | <i>Dorea</i>            | 2.12 (1.51)         | 1.725 (0.70)       | 1.97 (1.04)         | 2.255 (0.89)       |
|            | <i>Eubacterium</i>      | 2.775 (1.69)        | 2.335 (1.30)       | 0.045 (0.22)        | 0.06 (0.21)        |
|            | <i>Faecalibacterium</i> | 3.23 (1.17)         | 4.61 (4.61)        | 6.65 (3.45)         | 6.87 (5.46)        |
|            | <i>Lachnospira</i>      | 0.145 (0.32)        | 0.075 (0.63)       | 0.33 (0.20)         | 0.14 (0.4)         |
|            | <i>Oscillospira</i>     | 0.77 (0.25)         | 0.9 (0.2)          | 0.545 (0.36)        | 0.73 (0.29)        |
|            | <i>Prevotella</i>       | 0.435 (1.19)        | 0.745 (1.71)       | 0 (0.04)            | 0.03 (0.10)        |
|            | <i>Roseburia</i>        | 0.295 (0.61)        | 0.315 (0.66)       | 0.705 (0.42)        | 0.255 (0.67)       |
|            | <i>Ruminococcus</i>     | 4.77 (2.64)         | 4.04 (1.59)        | 5.505 (0.74)        | 4.745 (1.90)       |

|            |                                 |               |               |                |               |
|------------|---------------------------------|---------------|---------------|----------------|---------------|
|            | <i>Streptococcus</i>            | 1.84 (3.55)   | 0.425 (0.76)  | 1.115 (0.68)   | 1.385 (2.52)  |
|            | <i>Unclassified</i>             | 1.375 (1.07)  | 1.085 (1.43)  | 3.48 (4.16)    | 2.865 (2.85)  |
|            | <i>Un_Christensenellaceae</i>   | 0.25 (0.8)    | 0.905 (1.47)  | 0.02 (0.08)    | 0.025 (0.03)  |
|            | <i>Un.Clostridiaceae</i>        | 0.375 (1.05)  | 0.73 (0.81)   | 1.15 (0.89)    | 0.435 (0.52)  |
|            | <i>Un.Clostridiales</i>         | 9.185 (7.61)  | 9.2 (5.39)    | 3.08 (1.53)    | 2.52 (3.39)   |
|            | <i>Un.Coriobacteriaceae</i>     | 0.565 (0.23)  | 0.395 (0.41)  | 0.58 (0.64)    | 0.575 (0.32)  |
|            | <i>Un.Enterobacteriaceae</i>    | 0.015 (0.12)  | 0.29 (1.11)   | 0.01 (0.01)    | 0.665 (1.40)  |
|            | <i>Un.Erysipelotrichaceae</i>   | 0.74 (0.73)   | 0.535 (0.59)  | 1.62 (1.93)    | 1.57 (2.76)   |
|            | <i>Un.Lachnospiraceae</i>       | 8.355 (4.39)  | 7.49 (3.78)   | 8.775 (7.56)   | 5.325 (6.6)   |
|            | <i>Un.Peptostreptococcaceae</i> | 0.25 (0.22)   | 0.435 (0.26)  | 0.94 (1.08)    | 0.625 (1.01)  |
|            | <i>Un.Ruminococcaceae</i>       | 23.7 (13.21)  | 25.98 (7.58)  | 20.055 (8.96)  | 23.37 (11.78) |
| Cluster B2 | <i>Akkermansia</i>              | 1.47 (3.44)   | 1.245 (4.16)  | 0.055 (0.05)   | 0.35 (0.35)   |
|            | <i>Bacteroides</i>              | 5.405 (5.9)   | 4.71 (1.48)   | 18.925 (5.81)  | 8.455 (5.04)  |
|            | <i>Bifidobacterium</i>          | 0.915 (1.66)  | 0.605 (1.17)  | 1.645 (1.39)   | 3.805 (2.80)  |
|            | <i>Blautia</i>                  | 6.725 (4.8)   | 8.42 (3.13)   | 10.465 (4.00)  | 10.93 (1.9)   |
|            | <i>Collinsella</i>              | 0.695 (0.71)  | 0.725 (0.34)  | 1.12 (0.45)    | 1.23 (0.24)   |
|            | <i>Coprococcus</i>              | 5.335 (1.71)  | 6.65 (3.16)   | 3.345 (0.58)   | 5.16 (1.4)    |
|            | <i>Dialister</i>                | 3.07 (2.87)   | 3.4 (3.14)    | 4.405 (1.63)   | 5.085 (0.98)  |
|            | <i>Dorea</i>                    | 1.415 (0.68)  | 1.515 (0.50)  | 2.025 (0.15)   | 1.33 (0.01)   |
|            | <i>Eubacterium</i>              | 0 (0)         | 0 (0)         | 2.13 (1.12)    | 4.085 (2.94)  |
|            | <i>Faecalibacterium</i>         | 6.74 (2.66)   | 4.515 (1.81)  | 9.11 (5.78)    | 13.27 (9.26)  |
|            | <i>Lachnospira</i>              | 0.66 (1.46)   | 0.69 (0.24)   | 0.52 (0.52)    | 0.04 (0.04)   |
|            | <i>Oscillospira</i>             | 0.77 (0.39)   | 0.93 (0.57)   | 0.68 (0.21)    | 0.425 (0.14)  |
|            | <i>Prevotella</i>               | 0.11 (1.46)   | 0.145 (0.58)  | 0.005 (0.01)   | 0.005 (0.01)  |
|            | <i>Roseburia</i>                | 1.265 (0.88)  | 0.66 (0.40)   | 3.01 (1.82)    | 1.755 (1.03)  |
|            | <i>Ruminococcus</i>             | 6.07 (1.19)   | 5.23 (1.91)   | 4.49 (0.46)    | 4.605 (1.83)  |
|            | <i>Streptococcus</i>            | 0.195 (0.38)  | 0.43 (0.79)   | 0.665 (0.65)   | 0.16 (0.11)   |
|            | <i>Unclassified</i>             | 1.3 (0.17)    | 1.295 (0.70)  | 2.285 (0.87)   | 2.365 (1.43)  |
|            | <i>Un.Christensenellaceae</i>   | 0.245 (0.31)  | 0.255 (0.67)  | 0.045 (0.02)   | 0.04 (0.03)   |
|            | <i>Un.Clostridiaceae</i>        | 0.51 (0.56)   | 0.36 (0.52)   | 0.72 (0.52)    | 0.4 (0.36)    |
|            | <i>Un.Clostridiales</i>         | 14.835 (4.52) | 14.095 (4.76) | 4.005 (2.58)   | 3.835 (2.74)  |
|            | <i>Un.Coriobacteriaceae</i>     | 0.27 (0.23)   | 0.265 (0.08)  | 0.22 (0.21)    | 0.275 (0.27)  |
|            | <i>Un.Enterobacteriaceae</i>    | 0.015 (0.17)  | 0.165 (1.08)  | 0.255 (0.26)   | 1.025 (0.61)  |
|            | <i>Un.Erysipelotrichaceae</i>   | 0.78 (0.51)   | 0.945 (0.79)  | 0.815 (0.04)   | 1.35 (0.89)   |
|            | <i>Un.Lachnospiraceae</i>       | 5.43 (1.89)   | 6.795 (3.5)   | 3.915 (0.30)   | 6.16 (3.95)   |
|            | <i>Un.Peptostreptococcaceae</i> | 0.265 (0.22)  | 0.45 (0.21)   | 0.895 (0.48)   | 0.855 (0.78)  |
|            | <i>Un.Ruminococcaceae</i>       | 26.295 (3.21) | 26.38 (3.63)  | 17.035 (5.85)  | 20.88 (6.3)   |
| Cluster B3 | <i>Akkermansia</i>              | 1.75 (3.89)   | 8.68 (5.78)   | 0.325 (3.84)   | 0.38 (2.99)   |
|            | <i>Bacteroides</i>              | 6.07 (4.61)   | 5.6 (4.80)    | 1.3 (2.70)     | 1.895 (2.50)  |
|            | <i>Bifidobacterium</i>          | 3.46 (1.60)   | 0.83 (0.52)   | 17.555 (16.25) | 9.62 (9.94)   |
|            | <i>Blautia</i>                  | 6.66 (5.84)   | 3.27 (2.34)   | 8.43 (4.72)    | 5.755 (1.38)  |
|            | <i>Collinsella</i>              | 1.42 (1.48)   | 0.32 (0.71)   | 2.19 (2.51)    | 1.595 (1.45)  |
|            | <i>Coprococcus</i>              | 5.8 (1.29)    | 3.74 (1.94)   | 5.845 (2.11)   | 4.12 (2.19)   |
|            | <i>Dialister</i>                | 0 (0)         | 0 (0)         | 0.01 (0.21)    | 0.02 (0.83)   |
|            | <i>Dorea</i>                    | 2.44 (0.36)   | 1.8 (0.13)    | 2.28 (0.63)    | 1.84 (0.63)   |
|            | <i>Eubacterium</i>              | 0.03 (0.06)   | 0.04 (0.02)   | 0.08 (1.8)     | 0.065 (1.57)  |
|            | <i>Faecalibacterium</i>         | 1.86 (1.02)   | 4.52 (1.82)   | 2.18 (2.75)    | 9.12 (4.99)   |
|            | <i>Lachnospira</i>              | 0.46 (0.13)   | 0.99 (0.45)   | 0.235 (0.15)   | 0.155 (0.22)  |
|            | <i>Oscillospira</i>             | 1.32 (0.40)   | 0.94 (0.2)    | 0.75 (0.59)    | 0.515 (0.17)  |
|            | <i>Prevotella</i>               | 0.49 (0.08)   | 0.32 (0.73)   | 0.015 (0.29)   | 0.035 (0.66)  |
|            | <i>Roseburia</i>                | 0.12 (0.07)   | 0.23 (0.09)   | 0.34 (0.33)    | 0.85 (0.65)   |
|            | <i>Ruminococcus</i>             | 9.09 (1.47)   | 6.96 (2.60)   | 6.605 (2.38)   | 7.695 (4.24)  |
|            | <i>Streptococcus</i>            | 0.35 (1.16)   | 0.63 (0.6)    | 1.5 (1.26)     | 0.82 (1.30)   |
|            | <i>Unclassified</i>             | 1.97 (0.61)   | 1.31 (0.19)   | 2.05 (0.87)    | 2.21 (1.22)   |
|            | <i>Un.Christensenellaceae</i>   | 2.77 (1.58)   | 2.35 (1.74)   | 0.14 (0.22)    | 0.175 (0.05)  |
|            | <i>Un.Clostridiaceae</i>        | 1.49 (0.44)   | 0.95 (0.42)   | 1.39 (1.09)    | 1.265 (0.45)  |

|                                 |              |              |               |               |
|---------------------------------|--------------|--------------|---------------|---------------|
| <i>Un.Clostridiales</i>         | 9.3 (2.25)   | 9.45 (0.92)  | 12.075 (6.32) | 8.175 (7.5)   |
| <i>Un.Coriobacteriaceae</i>     | 1.25 (0.34)  | 0.85 (0.99)  | 0.935 (1.16)  | 0.465 (0.42)  |
| <i>Un.Enterobacteriaceae</i>    | 0.07 (0.02)  | 0.19 (0.24)  | 0.03 (0.07)   | 0.375 (0.86)  |
| <i>Un.Erysipelotrichaceae</i>   | 1.16 (0.63)  | 2.69 (0.92)  | 1.415 (0.87)  | 1.305 (0.20)  |
| <i>Un.Lachnospiraceae</i>       | 5.75 (3.54)  | 4.43 (1.22)  | 4.47 (2.45)   | 4.47 (2.14)   |
| <i>Un.Peptostreptococcaceae</i> | 0.68 (0.47)  | 0.46 (0.51)  | 1.425 (0.92)  | 0.555 (0.76)  |
| <i>Un.Ruminococcaceae</i>       | 26.06 (2.05) | 28.09 (1.02) | 11.295 (6.18) | 18.195 (7.00) |

Data is expressed as median (interquartile range). Only those genera that had an averaged relative abundance higher than 0.5% were included in the table.
